# Supplementary material for: Cocaine-induced DNA-PK relieves RNAP II pausing by promoting TRIM28 phosphorylation
Source: PubMed Central journal article supplement — bioRxiv. 2024 Aug 19:2024.08.19.608673. Preprint. [Version 1] doi: 10.1101/2024.08.19.608673 (PMC11370412; doi:10.1101/2024.08.19.608673), 2024-08-19
Supplement: media-1.pdf [file media-1.pdf]

Research Article

# **Cocaine-induced DNA-PK relieves RNAP II pausing by promoting TRIM28 phosphorylation.**

Adhikarimayum Lakhikumar Sharma<sup>1</sup>, Priya Tyagi<sup>1</sup>, Meenata Khumallambam<sup>1</sup>, Mudit Tyagi<sup>1\*</sup>

<sup>1</sup> Center for Translational Medicine, Thomas Jefferson University, 1020 Locust Street, Philadelphia, PA 19107, USA

## Supplementary Table S1

**Table S1: List of primer sequences.**

| <b>Primer Sets</b>               | <b>Primer name</b> | <b>Sequence (5'-3')</b> | <b>Purpose</b> |
|----------------------------------|--------------------|-------------------------|----------------|
| <b>1<sup>st</sup> Set primer</b> | GAPDHF             | CGGGATTGTCTGCCCTAATTAT  | Real time PCR  |
|                                  | GAPDHR             | GCACGGAAGGTCACGATGT     | Real time PCR  |
| <b>2<sup>nd</sup> Set primer</b> | HIV Promoter F     | AGCTTGCTACAAGGGACTTTCC  | Real time PCR  |
|                                  | HIV promoter R     | ACCCAGTACAGGCCAAAAGCAG  | Real time PCR  |
| <b>3<sup>rd</sup> Set primer</b> | HIV Nuc-1F         | CTGGGAGCTCTCTGGCTAACTA  | Real time PCR  |
|                                  | HIV Nuc-1R         | TTACCAGAGTCACACAACAGACG | Real time PCR  |
| <b>4<sup>th</sup> Set primer</b> | HIV Nuc-2F         | GACTGGTGAGTACGCCAAAA    | Real time PCR  |
|                                  | HIV Nuc-2R         | TTCCCACTGCGATCTAATTC    | Real time PCR  |
| <b>5<sup>th</sup> Set primer</b> | HIV envF           | TGAGGGACAATCGGAGAAG     | Real time PCR  |
|                                  | HIV envR           | TCTGCACCACTCTTCTCTT     | Real time PCR  |
| <b>6<sup>th</sup> Set primer</b> | DNA-PKF1           | ACGGTAGGGGAAAGCCATTG    | Real time PCR  |
|                                  | DNA-PKR1           | CGCTATAGGTCCTCAGCTGC    | Real time PCR  |
| <b>7<sup>th</sup> Set primer</b> | ActinF1            | AGAGCAAGAGAGGCATCCTG    | Real time PCR  |
|                                  | ActinR1            | GGGTCATCTTTTCACGGTTGG   | Real time PCR  |

## Supplementary Figure S1

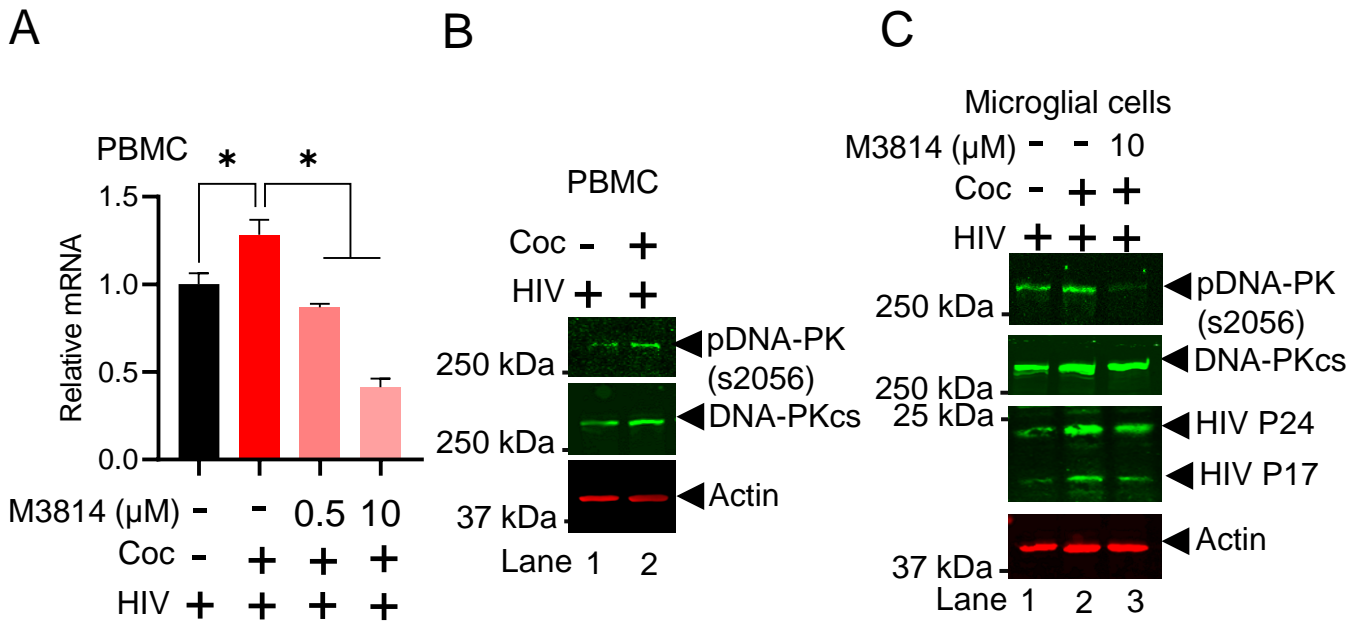

### Supplementary Figure S1: DNA-PK inhibition strongly suppresses cocaine induced HIV transcription and replication.

(A) PBMCs were treated with M3814 for overnight 24 h. Next day cells were treated with cocaine for 3 h and thereafter infected with replication competent HIV. DNA-PK (A) and HIV transcripts (in main figure 5D and E) were quantified by real-time PCR. The result is expressed as mean  $\pm$  SD and analyzed by two-way ANOVA followed by Tukey's multiple comparisons test. Asterisks over the bars indicate significant differences: \* $p < 0.05$ . (B) PBMCs were exposed to cocaine for a duration of 3 h, followed by infection with HIV. Subsequently, nuclear lysates were subjected to analysis via immunoblotting using specific antibodies targeting phosphorylated pDNA-PK (S2056), DNA-PKcs, and Actin. (C) Microglial cells were exposed to M3814 for a duration of 24 hours. The following day, the cells were subjected to treatment with cocaine and subsequent infection with HIV. Nuclear lysates were then analyzed via immunoblotting, utilizing specific antibodies targeting phosphorylated pDNA-PK (S2056), DNA-PKcs, HIV p24, and Actin.
